# Supplementary material for: Tracking the Transition from Pericyclic to Pseudopericyclic Reaction Mechanisms Using Multicenter Electron Delocalization Analysis: The [1,3] Sigmatropic Rearrangement
Source: PubMed Central journal article supplement (PMC8693182; doi:10.1021/acs.jpca.1c06620), 2021-09-11
Supplement: jp1c06620_si_001.pdf [file jp1c06620_si_001.pdf]

# Tracking the Transition from Pericyclic to Pseudopericyclic Reaction Mechanisms Using Multicenter Electron Delocalization Analysis: The [1,3] Sigmatropic Rearrangement

Álvaro Pérez-Barcia, Ángeles Peña-Gallego and Marcos Mandado\*

*Department of Physical Chemistry, University of Vigo, Lagoas-Marcosende s/n, 36310.Vigo, Spain*

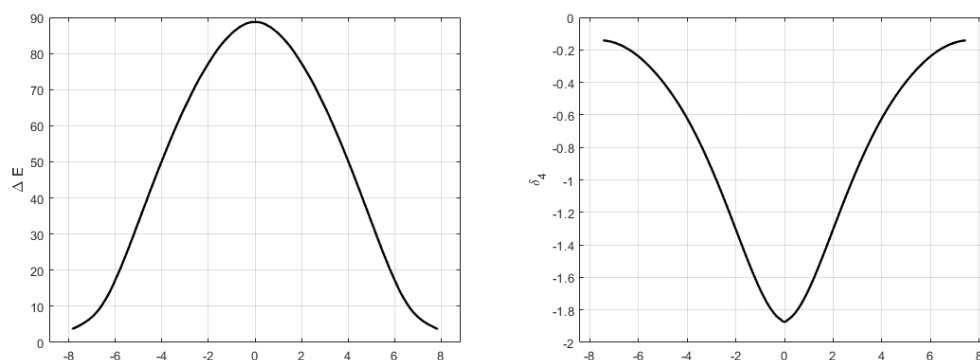

Figure S1. Energy profile (left) and the 4-center delocalization index profile (right) along the reaction coordinate of the [1,3] sigmatropic rearrangements for structures **A**. Energy in kcal/mol and delocalization index in au.

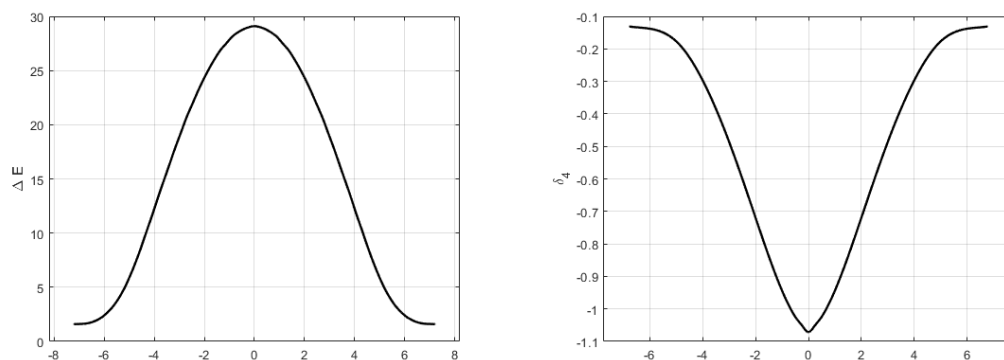

Figure S2. Energy profile (left) and the 4-center delocalization index profile (right) along the reaction coordinate of the [1,3] sigmatropic rearrangements for structures **B**. Energy in kcal/mol and delocalization index in au.

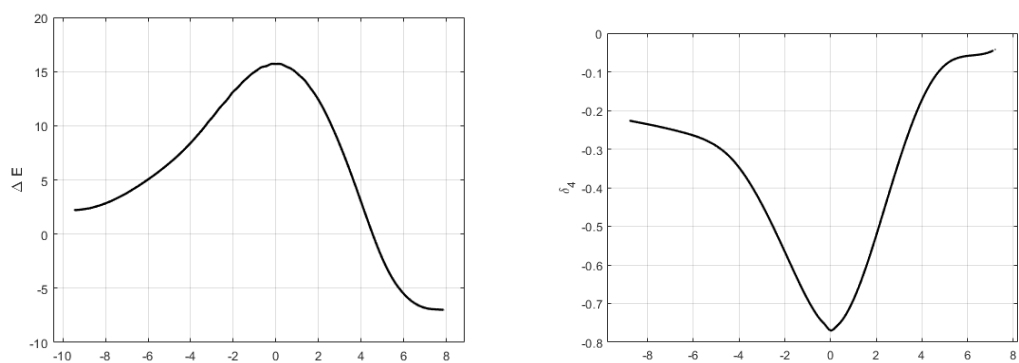

Figure S3. Energy profile (left) and the 4-center delocalization index profile (right) along the reaction coordinate of the [1,3] sigmatropic rearrangements for structures **C**. Energy in kcal/mol and delocalization index in au.

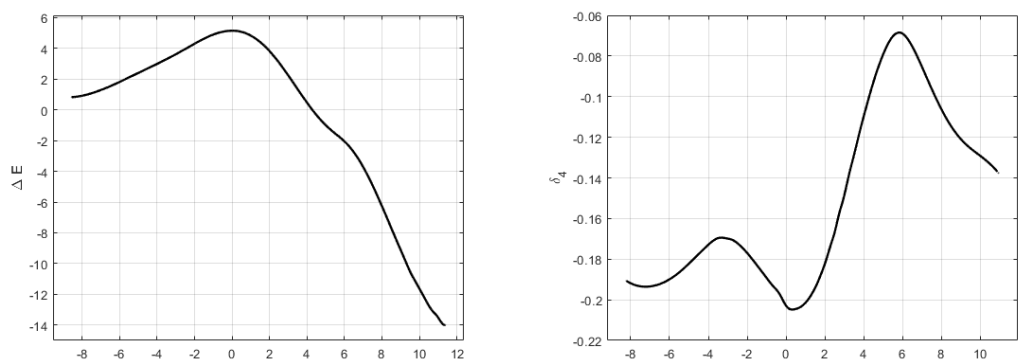

Figure S4. Energy profile (left) and the 4-center delocalization index profile (right) along the reaction coordinate of the [1,3] sigmatropic rearrangements for structures **D**. Energy in kcal/mol and delocalization index in au.

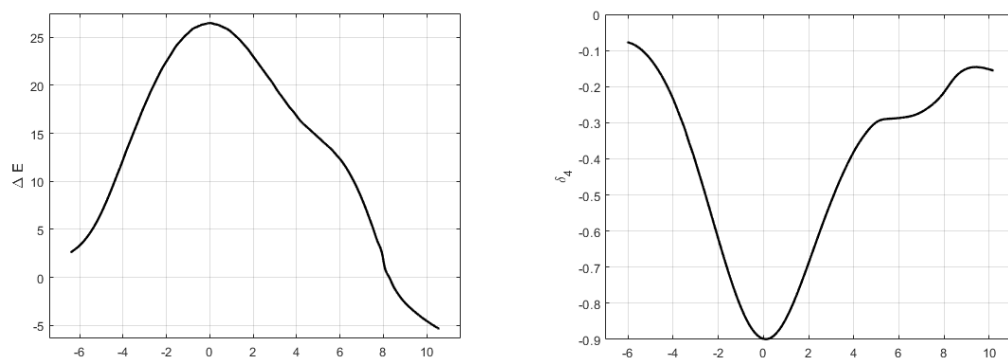

Figure S5. Energy profile (left) and the 4-center delocalization index profile (right) along the reaction coordinate of the [1,3] sigmatropic rearrangements for structures **E**. Energy in kcal/mol and delocalization index in au.

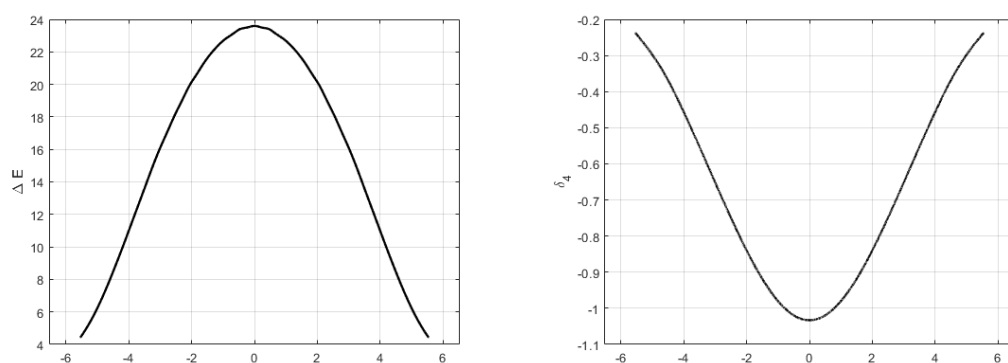

Figure S6. Energy profile (left) and the 4-center delocalization index profile (right) along the reaction coordinate of the [1,3] sigmatropic rearrangements for structures **F**. Energy in kcal/mol and delocalization index in au.

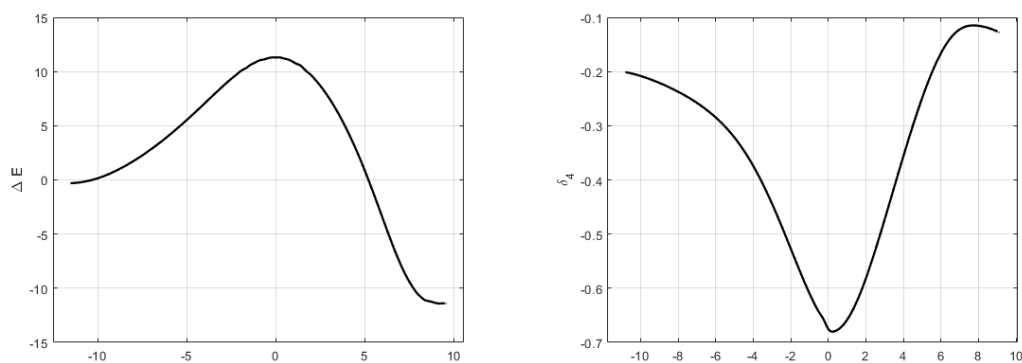

Figure S7. Energy profile (left) and the 4-center delocalization index profile (right) along the reaction coordinate of the [1,3] sigmatropic rearrangements for structures **G**. Energy in kcal/mol and delocalization index in au.

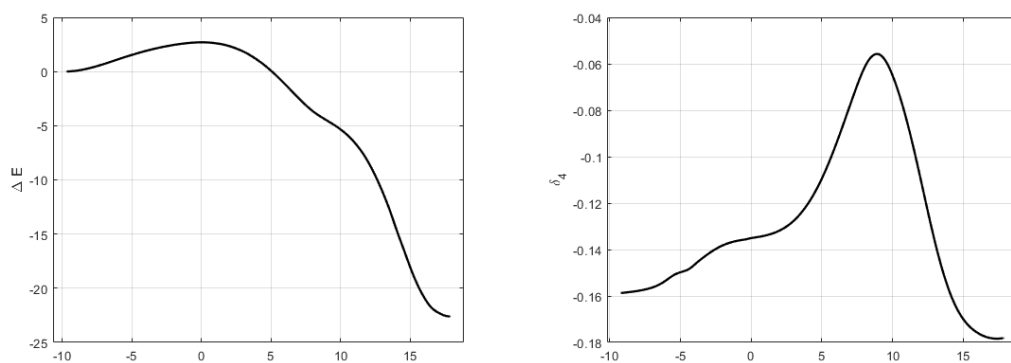

Figure S8. Energy profile (left) and the 4-center delocalization index profile (right) along the reaction coordinate of the [1,3] sigmatropic rearrangements for structures **H**. Energy in kcal/mol and delocalization index in au.

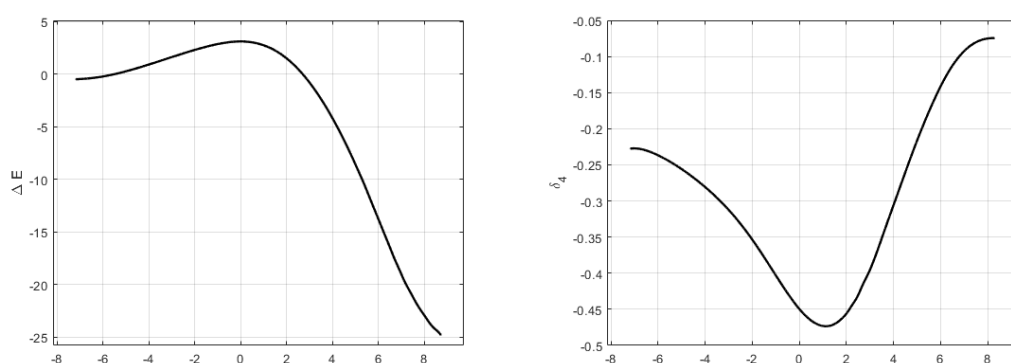

Figure S9. Energy profile (left) and the 4-center delocalization index profile (right) along the reaction coordinate of the [1,3] sigmatropic rearrangements for structures **I**. Energy in kcal/mol and delocalization index in au.

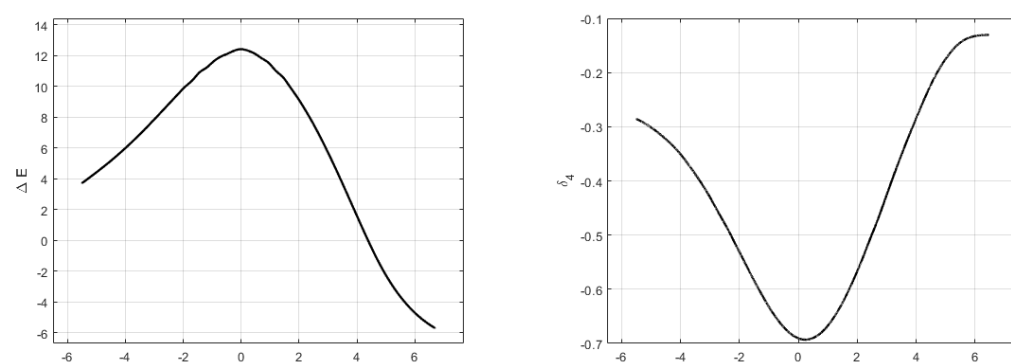

Figure S10. Energy profile (left) and the 4-center delocalization index profile (right) along the reaction coordinate of the [1,3] sigmatropic rearrangements for structures **J**. Energy in kcal/mol and delocalization index in au.

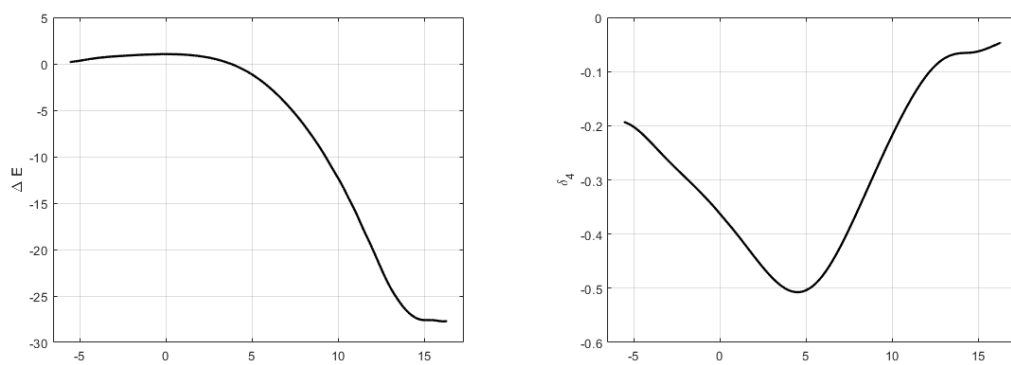

Figure S11. Energy profile (left) and the 4-center delocalization index profile (right) along the reaction coordinate of the [1,3] sigmatropic rearrangements for structures **K**. Energy in kcal/mol and delocalization index in au.

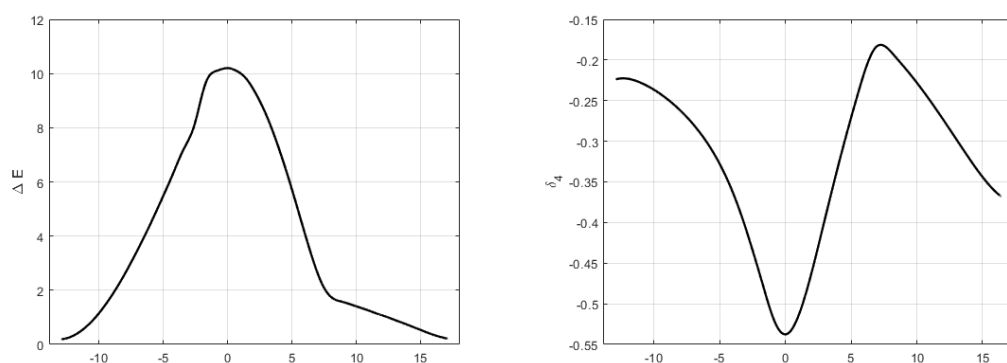

Figure S12. Energy profile (left) and the 4-center delocalization index profile (right) along the reaction coordinate of the [1,3] sigmatropic rearrangements for structures **L**. Energy in kcal/mol and delocalization index in au.

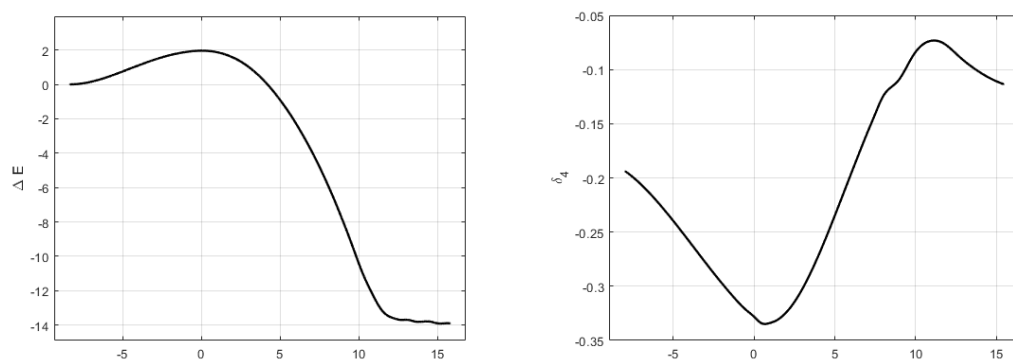

Figure S13. Energy profile (left) and the 4-center delocalization index profile (right) along the reaction coordinate of the [1,3] sigmatropic rearrangements for structures **M**. Energy in kcal/mol and delocalization index in au.

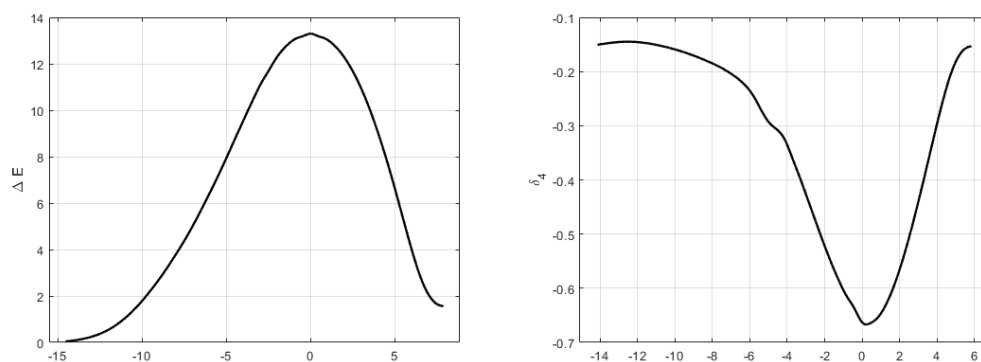

Figure S14. Energy profile (left) and the 4-center delocalization index profile (right) along the reaction coordinate of the [1,3] sigmatropic rearrangements for structures **N**. Energy in kcal/mol and delocalization index in au

A

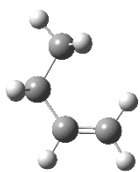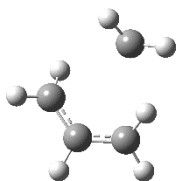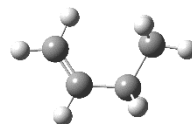

B

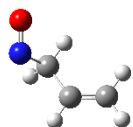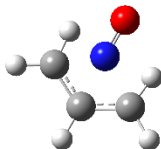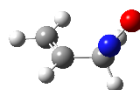

C

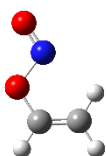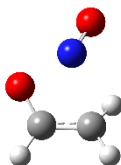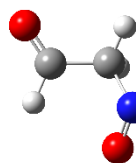

D

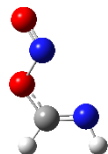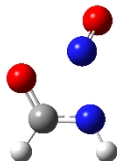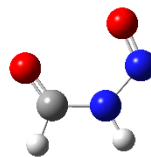

E

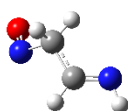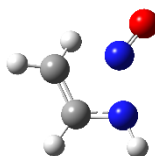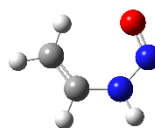

F

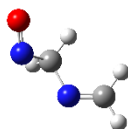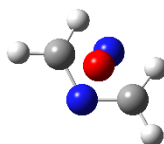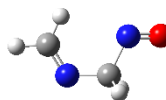

G

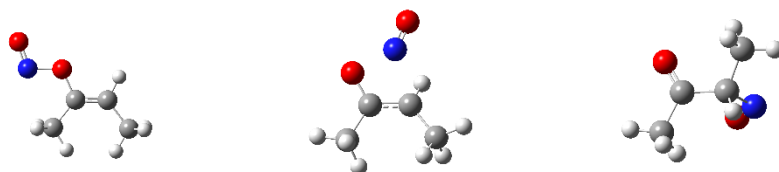

H

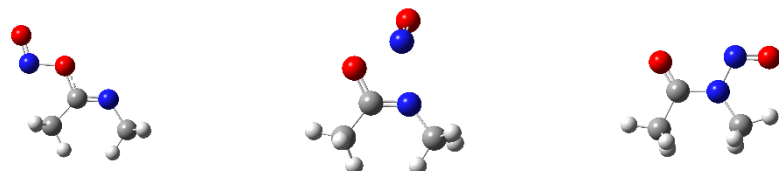

I

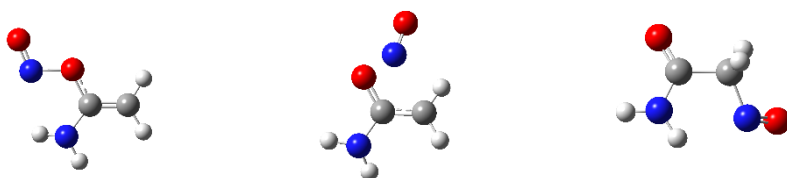

J

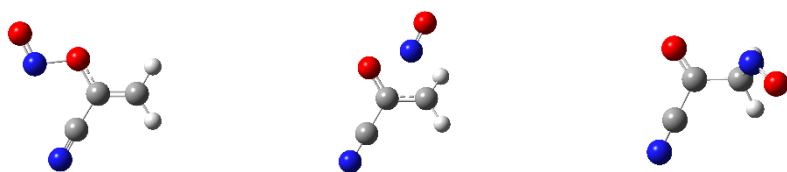

K

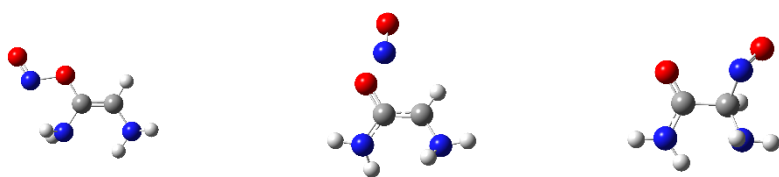

L

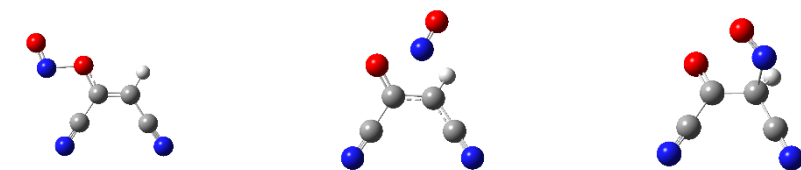



M

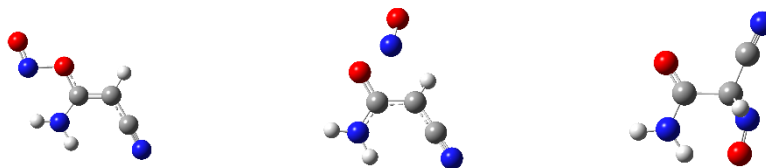

N

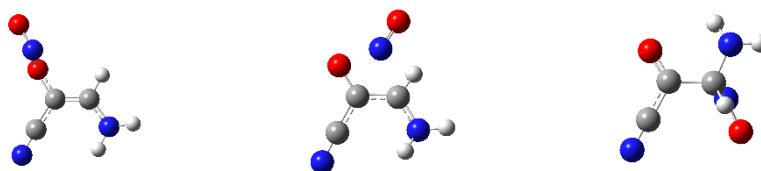

Figure S15. Representations from left to right of the reactant, transition state (TS) and product for each of the studied [1,3] sigmatropic rearrangements

Table S1. Cartesian coordinates of the reactant, TS and product for reaction A.

|   | Reactant  |           |           | TS        |           |           | Product   |           |           |
|---|-----------|-----------|-----------|-----------|-----------|-----------|-----------|-----------|-----------|
|   | X         | Y         | Z         | X         | Y         | Z         | X         | Y         | Z         |
| C | 0.642888  | 0.721541  | -0.000003 | -0.591163 | -1.231173 | 0.018053  | 0.855788  | 0.560348  | 0.000001  |
| H | 0.924562  | 1.331720  | 0.871055  | -1.073995 | -2.115955 | -0.393305 | -0.642888 | 0.721540  | -0.000001 |
| C | -0.855789 | 0.560349  | 0.000002  | -1.202800 | 0.006568  | -0.008842 | -0.924560 | 1.331717  | 0.871059  |
| H | -1.416582 | 1.495941  | 0.000007  | -2.299272 | 0.018520  | -0.039857 | -1.453698 | -0.575139 | 0.000000  |
| C | -1.534962 | -0.586982 | -0.000001 | -0.559151 | 1.232187  | 0.009163  | -1.234127 | -1.182097 | -0.884391 |
| H | -2.620669 | -0.599083 | -0.000001 | -1.048308 | 2.121196  | 0.403927  | -1.234123 | -1.182097 | 0.884390  |
| H | -1.041621 | -1.554418 | -0.000004 | 0.331725  | 1.383332  | -0.574599 | 1.534965  | -0.586982 | 0.000000  |
| C | 1.453696  | -0.575139 | 0.000002  | 1.913413  | -0.011937 | -0.004741 | 2.620671  | -0.599078 | -0.000001 |
| H | 2.526509  | -0.360288 | 0.000001  | 2.261605  | -0.947375 | 0.419136  | 1.041626  | -1.554419 | 0.000000  |
| H | 1.234122  | -1.182094 | 0.884394  | 2.005557  | 0.068066  | -1.082636 | 1.416580  | 1.495940  | 0.000002  |
| H | 1.234123  | -1.182100 | -0.884388 | 2.170522  | 0.871183  | 0.566181  | -2.526510 | -0.360286 | 0.000003  |
| H | 0.924557  | 1.331712  | -0.871067 | 0.290370  | -1.372836 | 0.619360  | -0.924558 | 1.331715  | -0.871063 |

Table S2. Cartesian coordinates of the reactant, TS and product for reaction B.

|   | Reactant  |           |           | TS        |           |           | Product   |           |           |
|---|-----------|-----------|-----------|-----------|-----------|-----------|-----------|-----------|-----------|
|   | X         | Y         | Z         | X         | Y         | Z         | X         | Y         | Z         |
| C | 2.152124  | -0.483176 | -0.082717 | 0.790962  | -1.221315 | 0.223024  | 0.790962  | -1.221315 | 0.223024  |
| H | 2.077745  | -1.332119 | 0.591963  | 0.226087  | -1.326978 | 1.143578  | 0.226087  | -1.326978 | 1.143578  |
| C | 1.176910  | 0.419055  | -0.185308 | 1.335944  | 0.000000  | -0.157933 | 1.335944  | 0.000000  | -0.157933 |
| N | -1.274828 | 0.336373  | -0.357044 | -0.992739 | 0.000000  | -0.549283 | -0.992739 | 0.000000  | -0.549283 |
| O | -2.055346 | -0.555385 | -0.119956 | -1.903189 | 0.000000  | 0.169584  | -1.903189 | 0.000000  | 0.169584  |
| H | 3.065152  | -0.398928 | -0.663806 | 1.112197  | -2.143320 | -0.249300 | 1.112197  | -2.143320 | -0.249300 |
| H | 1.274737  | 1.255334  | -0.874989 | 1.990909  | 0.000001  | -1.028930 | 1.990909  | 0.000001  | -1.028930 |
| C | -0.102532 | 0.359889  | 0.596335  | 0.790963  | 1.221315  | 0.223024  | 0.790963  | 1.221315  | 0.223024  |
| H | -0.162214 | -0.500793 | 1.270081  | 0.226080  | 1.326978  | 1.143574  | 0.226080  | 1.326978  | 1.143574  |
| H | -0.247865 | 1.290365  | 1.165848  | 1.112198  | 2.143321  | -0.249298 | 1.112198  | 2.143321  | -0.249298 |

Table S3. Cartesian coordinates of the reactant, TS and product for reaction C.

|   | Reactant  |           |          | TS        |           |           | Product   |           |           |
|---|-----------|-----------|----------|-----------|-----------|-----------|-----------|-----------|-----------|
|   | X         | Y         | Z        | X         | Y         | Z         | X         | Y         | Z         |
| C | 2.299391  | -0.109170 | 0.000000 | 0.881619  | 1.128480  | -0.115927 | -0.997574 | -0.358970 | -0.076658 |
| H | 2.565960  | 0.941372  | 0.000000 | 0.243570  | 1.371369  | -0.955577 | 0.031610  | 0.762651  | -0.228645 |
| C | 1.031230  | -0.507370 | 0.000000 | 1.326855  | -0.187747 | 0.062384  | -0.333090 | 1.689526  | 0.214359  |
| O | 0.000000  | 0.402548  | 0.000000 | 0.560962  | -1.163470 | -0.203066 | -2.166218 | -0.159502 | 0.140063  |
| N | -1.288742 | -0.286361 | 0.000000 | -0.957830 | -0.012769 | 0.493746  | 1.336393  | 0.372011  | 0.407438  |
| O | -2.166493 | 0.491592  | 0.000000 | -1.870293 | 0.101889  | -0.185103 | 1.807022  | -0.619365 | -0.107528 |
| H | 0.709683  | -1.545567 | 0.000000 | 1.402235  | 1.957794  | 0.354621  | -0.570130 | -1.376449 | -0.192627 |
| H | 3.093774  | -0.845157 | 0.000000 | 2.282801  | -0.391531 | 0.571345  | 0.217821  | 0.891698  | -1.302266 |

Table S4. Cartesian coordinates of the reactant, TS and product for reaction D.

|   | Reactant  |           |           | TS        |           |           | Product   |           |           |
|---|-----------|-----------|-----------|-----------|-----------|-----------|-----------|-----------|-----------|
|   | X         | Y         | Z         | X         | Y         | Z         | X         | Y         | Z         |
| C | -1.251673 | 0.435295  | 0.057426  | 1.298889  | -0.130448 | -0.040051 | 1.208876  | 0.315598  | 0.000000  |
| O | 0.059090  | 0.764803  | -0.092311 | 0.532072  | -1.147106 | -0.048447 | 1.439776  | -0.866610 | 0.000000  |
| N | 0.988209  | -0.404801 | 0.256220  | -0.961023 | 0.049551  | 0.483429  | -1.336852 | 0.346568  | 0.000001  |
| O | 2.058246  | -0.161389 | -0.118687 | -1.799313 | 0.082843  | -0.280005 | -1.363290 | -0.854496 | 0.000000  |
| H | -1.827071 | 1.331561  | 0.317124  | 2.386816  | -0.297494 | 0.025692  | 1.996411  | 1.097102  | 0.000002  |
| N | -1.689271 | -0.738864 | -0.118115 | 0.761859  | 1.057161  | -0.099514 | -0.056157 | 0.917622  | -0.000002 |
| H | -2.694151 | -0.765000 | 0.059564  | 1.351917  | 1.847301  | 0.154828  | -0.110486 | 1.928836  | 0.000001  |

Table S5. Cartesian coordinates of the reactant, TS and product for reaction E.

|   | Reactant  |           |           | TS        |           |           | Product   |           |           |
|---|-----------|-----------|-----------|-----------|-----------|-----------|-----------|-----------|-----------|
|   | X         | Y         | Z         | X         | Y         | Z         | X         | Y         | Z         |
| C | 1.208642  | 0.377470  | 0.084853  | 1.361672  | -0.109445 | -0.087399 | 1.111830  | 0.511601  | -0.000001 |
| N | -1.251638 | 0.436335  | 0.225763  | -0.968298 | -0.016838 | -0.485315 | -1.378121 | 0.243658  | 0.000000  |
| O | -2.121178 | -0.402120 | 0.239564  | -1.914357 | 0.059735  | 0.164772  | -1.243193 | -0.971013 | -0.000001 |
| N | 2.146469  | -0.478011 | 0.145964  | 2.250075  | -0.233913 | -0.717448 | 1.797479  | 1.354655  | -0.000006 |
| H | 1.247390  | 1.383278  | 0.525741  | 0.839750  | 1.172143  | 0.137840  | -0.220690 | 0.949913  | 0.000001  |
| H | 2.949160  | -0.092436 | 0.652592  | 0.237947  | 1.364336  | 1.016584  | -0.402235 | 1.943704  | 0.000006  |
| C | -0.074270 | 0.044779  | -0.628529 | 1.267084  | 2.037582  | -0.358784 | 1.579251  | -0.743219 | 0.000001  |
| H | -0.169630 | 0.691542  | -1.514716 | 0.603073  | -1.125100 | 0.274822  | 0.940796  | -1.611519 | 0.000004  |
| H | -0.127546 | -1.007182 | -0.920167 | 0.907791  | -2.028503 | -0.087721 | 2.654694  | -0.884021 | -0.000001 |

Table S6. Cartesian coordinates of the reactant, TS and product for reaction F.

|   | Reactant  |           |           | TS        |           |           | Product   |           |           |
|---|-----------|-----------|-----------|-----------|-----------|-----------|-----------|-----------|-----------|
|   | X         | Y         | Z         | X         | Y         | Z         | X         | Y         | Z         |
| C | -1.822165 | -0.624870 | -0.027315 | -0.265252 | -0.847851 | 1.132176  | -0.076851 | 0.771523  | 0.074019  |
| H | -2.900049 | -0.737062 | -0.157115 | 0.287198  | -0.915852 | 2.066056  | -0.462572 | 1.397106  | -0.740096 |
| C | 0.076851  | 0.771523  | 0.074019  | -0.265252 | -0.847851 | -1.132176 | 1.822165  | -0.624870 | -0.027315 |
| H | 0.240226  | 1.321106  | 1.012964  | -1.356915 | -0.821939 | -1.199536 | 1.242502  | -1.535651 | 0.147457  |
| H | -1.242502 | -1.535651 | 0.147457  | -1.356915 | -0.821939 | 1.199536  | -0.240226 | 1.321106  | 1.012964  |
| N | 0.942134  | -0.458103 | 0.186985  | -0.265252 | 1.000530  | 0.000000  | -0.942134 | -0.458103 | 0.186985  |
| O | 2.083451  | -0.243558 | -0.154044 | 0.560293  | 1.809879  | 0.000000  | -2.083451 | -0.243558 | -0.154044 |
| H | 0.462572  | 1.397106  | -0.740096 | 0.287198  | -0.915852 | -2.066056 | 2.900049  | -0.737062 | -0.157115 |
| N | -1.335844 | 0.547109  | -0.088569 | 0.385267  | -1.118993 | 0.000000  | 1.335844  | 0.547109  | -0.088569 |

Table S7. Cartesian coordinates of the reactant, TS and product for reaction G.

|   | Reactant  |           |           | TS        |           |           | Product   |           |           |
|---|-----------|-----------|-----------|-----------|-----------|-----------|-----------|-----------|-----------|
|   | X         | Y         | Z         | X         | Y         | Z         | X         | Y         | Z         |
| C | 1.496388  | -0.730681 | 0.000000  | 0.365324  | 0.787726  | -0.386023 | 1.964338  | 0.399649  | 0.590678  |
| H | 1.301684  | -1.801062 | -0.000001 | -0.371391 | 1.096355  | -1.119016 | 2.901190  | 0.192976  | 0.072003  |
| C | 0.418016  | 0.064709  | -0.000003 | 0.540911  | -0.601000 | -0.235335 | 1.734044  | 1.468528  | 0.525854  |
| C | 0.373326  | 1.562405  | -0.000003 | 1.815362  | -1.235191 | 0.271158  | 2.066570  | 0.149507  | 1.653378  |
| H | -0.157881 | 1.943573  | -0.878433 | 1.841711  | -2.280092 | -0.045970 | 0.844532  | -0.399835 | -0.035503 |
| H | -0.157875 | 1.943574  | 0.878431  | 2.712052  | -0.720169 | -0.082561 | -0.561032 | -0.213516 | 0.556015  |
| H | 1.383219  | 1.971598  | -0.000006 | 1.827058  | -1.225738 | 1.368902  | -0.508810 | -0.089554 | 1.647327  |
| O | -0.799432 | -0.618933 | -0.000009 | -0.488801 | -1.349272 | -0.372760 | -1.533057 | -1.340253 | 0.201869  |
| N | -1.967055 | 0.225581  | 0.000009  | 1.342760  | 1.833001  | 0.065352  | -1.230329 | -2.267879 | 0.693378  |
| O | -2.941700 | -0.440654 | 0.000001  | 1.965794  | 1.489988  | 0.895932  | -2.544652 | -1.083182 | 0.525659  |
| C | 2.936418  | -0.313528 | 0.000004  | 2.015096  | 2.141876  | -0.749168 | -1.527253 | -1.511828 | -0.876238 |
| H | 3.071326  | 0.770107  | 0.000001  | 0.819168  | 2.737483  | 0.394423  | 1.020672  | -1.152901 | -0.972387 |
| H | 3.456535  | -0.713793 | 0.879251  | -1.564005 | 0.026808  | 0.544890  | -1.235627 | 1.079980  | 0.111871  |
| H | 3.456542  | -0.713799 | -0.879237 | -2.542148 | 0.332450  | 0.026799  | -0.586929 | 1.766063  | -0.640464 |

Table S8. Cartesian coordinates of the reactant, TS and product for reaction H.

|   | Reactant  |           |           | TS        |           |           | Product   |           |           |
|---|-----------|-----------|-----------|-----------|-----------|-----------|-----------|-----------|-----------|
|   | X         | Y         | Z         | X         | Y         | Z         | X         | Y         | Z         |
| C | -0.460498 | 0.023223  | -0.000001 | 0.525265  | -0.519231 | -0.070907 | 1.030184  | -0.383584 | 0.000000  |
| O | 0.774207  | -0.638752 | -0.000003 | -0.533754 | -1.272636 | -0.016751 | 1.232715  | -1.575595 | 0.000000  |
| N | 1.928706  | 0.235513  | 0.000003  | -1.648028 | 0.110651  | 0.477160  | -1.306194 | -0.787648 | 0.000000  |
| O | 2.912797  | -0.409871 | 0.000000  | -2.496942 | 0.251421  | -0.272309 | -2.424249 | -0.321437 | 0.000001  |
| N | -1.434839 | -0.777888 | 0.000000  | 0.316674  | 0.759540  | -0.155082 | -0.288500 | 0.156687  | 0.000000  |
| C | -0.417188 | 1.529254  | -0.000001 | 1.857211  | -1.233582 | -0.001925 | 2.142980  | 0.645678  | 0.000001  |
| H | -1.425035 | 1.941760  | -0.000002 | 2.646546  | -0.684919 | -0.519554 | 2.092623  | 1.290460  | -0.883219 |
| H | 0.117172  | 1.901347  | 0.878451  | 2.154528  | -1.365749 | 1.044101  | 2.092619  | 1.290463  | 0.883217  |

|   |           |           |           |          |           |           |           |          |           |
|---|-----------|-----------|-----------|----------|-----------|-----------|-----------|----------|-----------|
| H | 0.117174  | 1.901346  | -0.878452 | 1.753388 | -2.224031 | -0.448707 | 3.089626  | 0.106732 | 0.000003  |
| C | -2.814115 | -0.345594 | 0.000001  | 1.324088 | 1.776884  | 0.028461  | -0.592747 | 1.585917 | 0.000000  |
| H | -2.985672 | 0.739419  | 0.000000  | 2.351851 | 1.387836  | 0.008307  | -0.191559 | 2.072269 | -0.892663 |
| H | -3.312969 | -0.769782 | -0.878501 | 1.233433 | 2.538828  | -0.753454 | -1.679115 | 1.672730 | -0.000004 |
| H | -3.312967 | -0.769780 | 0.878507  | 1.185920 | 2.281993  | 0.993468  | -0.191566 | 2.072267 | 0.892666  |

Table S9. Cartesian coordinates of the reactant, TS and product for reaction I.

|   | Reactant  |           |           | TS        |           |           | Product   |           |           |
|---|-----------|-----------|-----------|-----------|-----------|-----------|-----------|-----------|-----------|
|   | X         | Y         | Z         | X         | Y         | Z         | X         | Y         | Z         |
| C | 1.996788  | -0.892727 | 0.036188  | 0.470124  | 1.377600  | -0.125719 | -1.033524 | -0.113525 | -0.005786 |
| H | 1.837052  | -1.961039 | 0.003489  | -0.351479 | 1.703481  | -0.745682 | 0.351178  | -0.651294 | -0.406117 |
| C | 0.951819  | -0.053049 | -0.003991 | 0.850290  | 0.045837  | -0.153528 | 0.332026  | -0.817508 | -1.491900 |
| O | -0.306048 | -0.627307 | -0.038189 | -0.027698 | -0.876043 | -0.448797 | -1.941931 | -0.879417 | 0.263020  |
| N | -1.401570 | 0.324908  | 0.047211  | -1.349647 | -0.129778 | 0.540926  | 1.416216  | 0.359472  | -0.175616 |
| O | -2.430475 | -0.244454 | -0.008112 | -2.336140 | -0.058040 | -0.040922 | 2.395993  | -0.079870 | 0.383142  |
| H | 3.010425  | -0.513485 | 0.070644  | 1.104876  | 2.137398  | 0.316850  | 0.564549  | -1.590242 | 0.110078  |
| N | 0.998672  | 1.330519  | -0.100073 | 2.080466  | -0.399824 | 0.277726  | -1.142929 | 1.240265  | -0.025397 |
| H | 0.258436  | 1.826493  | 0.376880  | 2.236647  | -1.391914 | 0.174892  | -2.018926 | 1.652068  | 0.258682  |
| H | 1.914916  | 1.708789  | 0.096246  | 2.882443  | 0.190295  | 0.116609  | -0.329070 | 1.820733  | -0.167657 |

Table S10. Cartesian coordinates of the reactant, TS and product for reaction J.

|   | Reactant  |           |           | TS        |           |           | Product   |           |           |
|---|-----------|-----------|-----------|-----------|-----------|-----------|-----------|-----------|-----------|
|   | X         | Y         | Z         | X         | Y         | Z         | X         | Y         | Z         |
| C | -1.618174 | -1.531482 | 0.000159  | 0.141220  | 1.294081  | 0.270147  | -0.638396 | -0.583579 | 0.110037  |
| H | -1.280769 | -2.560889 | 0.000150  | 0.955941  | 1.486774  | 0.955642  | 0.673555  | -0.202920 | 0.757244  |
| C | -0.732428 | -0.527532 | -0.000040 | -0.501693 | 0.048115  | 0.318898  | 0.997525  | -1.036354 | 1.389202  |
| O | 0.612755  | -0.804464 | -0.000333 | 0.151876  | -1.014909 | 0.550335  | -0.875629 | -1.690317 | -0.321525 |
| N | 1.470720  | 0.432194  | 0.000301  | 1.631724  | -0.153617 | -0.596687 | 1.765454  | -0.131317 | -0.341092 |
| O | 2.591155  | 0.122561  | 0.000002  | 2.680403  | -0.126540 | -0.157069 | 2.424887  | 0.863891  | -0.255884 |
| H | -2.679914 | -1.322943 | 0.000303  | -0.336970 | 2.153285  | -0.188554 | 0.646506  | 0.740385  | 1.306535  |
| C | -1.158703 | 0.848350  | -0.000045 | -1.900083 | -0.064626 | -0.090350 | -1.625235 | 0.505219  | -0.019473 |
| N | -1.558543 | 1.939668  | -0.000052 | -3.019419 | -0.156939 | -0.389797 | -2.407975 | 1.359182  | -0.110810 |

Table S11. Cartesian coordinates of the reactant, TS and product for reaction K.

|   | Reactant  |           |           | TS        |           |           | Product   |           |           |
|---|-----------|-----------|-----------|-----------|-----------|-----------|-----------|-----------|-----------|
|   | X         | Y         | Z         | X         | Y         | Z         | X         | Y         | Z         |
| C | 1.099681  | -0.804109 | -0.200030 | 0.826373  | -0.810637 | 0.303230  | 0.287040  | 0.387879  | 0.334088  |
| H | 0.569912  | -1.704276 | -0.494592 | 0.189887  | -1.521144 | 0.812787  | 0.559412  | 0.297489  | 1.391120  |
| C | 0.449641  | 0.374651  | -0.185712 | 0.437323  | 0.497636  | 0.206990  | -0.973061 | -0.448129 | 0.063291  |
| O | -0.904541 | 0.440427  | -0.495346 | -0.823016 | 0.855409  | 0.426688  | -0.897682 | -1.662543 | -0.040612 |
| N | -1.721046 | -0.378475 | 0.433181  | -1.661422 | -0.240750 | -0.523060 | 1.407710  | -0.212801 | -0.502869 |
| O | -2.835447 | -0.423053 | 0.064812  | -2.655631 | -0.558779 | -0.015514 | 2.339320  | -0.604236 | 0.158680  |
| N | 1.099741  | 1.582132  | 0.172138  | 1.303744  | 1.486079  | -0.280486 | -2.115218 | 0.277457  | -0.024260 |
| H | 0.964406  | 2.294252  | -0.542977 | 0.878099  | 2.404386  | -0.244449 | -2.990482 | -0.205407 | -0.155347 |
| H | 0.721717  | 1.960729  | 1.039772  | 2.215792  | 1.477686  | 0.165555  | -2.084445 | 1.277881  | 0.105929  |
| N | 2.410986  | -0.971358 | 0.214874  | 2.114012  | -1.221757 | -0.062734 | 0.141403  | 1.781154  | -0.036013 |
| H | 2.944594  | -1.651718 | -0.309850 | 2.231326  | -2.225480 | -0.094313 | 0.915813  | 2.333476  | 0.322636  |
| H | 2.895569  | -0.087322 | 0.325020  | 2.437568  | -0.795483 | -0.926324 | 0.145454  | 1.871620  | -1.051166 |

Table S12. Cartesian coordinates of the reactant, TS and product for reaction L.

|   | Reactant  |           |           | TS        |           |           | Product   |           |           |
|---|-----------|-----------|-----------|-----------|-----------|-----------|-----------|-----------|-----------|
|   | X         | Y         | Z         | X         | Y         | Z         | X         | Y         | Z         |
| C | 1.191724  | -1.046859 | 0.000001  | 0.058186  | 0.679555  | 0.526791  | 0.436889  | 0.517873  | 0.562647  |
| H | 1.065737  | -2.124906 | 0.000001  | 0.810018  | 0.942356  | 1.262008  | 1.013573  | 0.588311  | 1.488626  |
| C | 0.085119  | -0.264803 | 0.000004  | -0.183867 | -0.709089 | 0.320753  | -0.212561 | -0.823593 | 0.457096  |
| O | -1.131068 | -0.859086 | 0.000010  | 0.771669  | -1.524323 | 0.369166  | 0.366037  | -1.822516 | 0.837459  |
| N | -2.320441 | 0.160869  | -0.000011 | 1.905924  | -0.033219 | -0.608892 | 1.751514  | 0.538150  | -0.573182 |
| O | -3.310261 | -0.426067 | -0.000003 | 2.913643  | 0.235721  | -0.169448 | 2.254828  | -0.505344 | -0.705198 |
| C | 0.163018  | 1.172384  | 0.000003  | -1.503200 | -1.183759 | -0.080790 | -1.504455 | -0.912343 | -0.240061 |
| C | 2.512910  | -0.530795 | -0.000003 | -2.547707 | -1.596224 | -0.379148 | -2.526885 | -1.025380 | -0.779892 |
| N | 3.611833  | -0.145775 | -0.000005 | -0.846006 | 1.697618  | 0.139323  | -0.351932 | 1.696295  | 0.299552  |
| N | 0.244076  | 2.331558  | 0.000003  | -1.564387 | 2.552372  | -0.197132 | -0.965792 | 2.653685  | 0.064200  |

Table S13. Cartesian coordinates of the reactant, TS and product for reaction M.

|   | Reactant  |           |           | TS        |           |           | Product   |           |           |
|---|-----------|-----------|-----------|-----------|-----------|-----------|-----------|-----------|-----------|
|   | X         | Y         | Z         | X         | Y         | Z         | X         | Y         | Z         |
| C | -1.197505 | -0.863536 | -0.015292 | 0.533327  | -0.518139 | 0.421320  | 0.511327  | -0.978300 | 0.010890  |
| H | -1.040420 | -1.933095 | -0.044793 | -0.021689 | -1.182136 | 1.068740  | -0.287068 | 0.313691  | 0.390927  |
| C | -0.119854 | -0.024852 | -0.013924 | 0.030637  | 0.778267  | 0.197638  | -0.073906 | 0.559104  | 1.437747  |
| O | 1.103916  | -0.623791 | 0.000711  | -1.248084 | 0.985889  | 0.294154  | -0.038515 | -1.936519 | -0.488903 |
| N | 2.257383  | 0.335957  | 0.020017  | -1.765681 | -0.544973 | -0.566646 | 0.196875  | 1.530289  | -0.438687 |
| O | 3.257622  | -0.263230 | 0.008698  | -2.596130 | -1.084835 | -0.000928 | 1.323754  | 1.847195  | -0.158975 |
| C | -2.506976 | -0.336009 | 0.007719  | 1.859237  | -0.857480 | 0.080826  | -1.719636 | 0.151898  | 0.187584  |
| N | -3.567823 | 0.151959  | 0.032462  | 2.961363  | -1.098657 | -0.225655 | -2.867201 | 0.075006  | 0.043212  |
| N | -0.177810 | 1.334282  | -0.078215 | 0.811120  | 1.811364  | -0.191281 | 1.826692  | -0.905200 | 0.342051  |
| H | -1.094389 | 1.744365  | 0.032444  | 0.373448  | 2.660084  | -0.510992 | 2.420769  | -1.652001 | 0.010886  |
| H | 0.606274  | 1.875890  | 0.246206  | 1.815128  | 1.723599  | -0.217196 | 2.248929  | -0.016915 | 0.571960  |

Table S14. Cartesian coordinates of the reactant, TS and product for reaction N.

|   | Reactant  |           |           | TS        |           |           | Product   |           |           |
|---|-----------|-----------|-----------|-----------|-----------|-----------|-----------|-----------|-----------|
|   | X         | Y         | Z         | X         | Y         | Z         | X         | Y         | Z         |
| C | -0.925631 | -1.186444 | -0.136380 | 0.147978  | 0.883925  | 0.451432  | 0.628119  | -0.671125 | -0.062297 |
| H | -0.340858 | -2.080564 | -0.328505 | 0.973952  | 1.039757  | 1.133752  | -0.697965 | -0.188358 | 0.469300  |
| C | -0.308084 | 0.018943  | -0.270367 | -0.412905 | -0.429274 | 0.393971  | -0.583917 | 0.381745  | 1.396440  |
| O | 1.018133  | 0.091785  | -0.660966 | 0.278905  | -1.458700 | 0.583870  | 0.752890  | -1.706783 | -0.685103 |
| N | 1.934672  | -0.147903 | 0.515232  | 1.719705  | -0.321245 | -0.657375 | -1.237280 | 0.866143  | -0.613585 |
| O | 3.045194  | -0.112934 | 0.162493  | 2.786385  | -0.156303 | -0.256326 | -1.258734 | 1.987795  | -0.198125 |
| N | -2.233282 | -1.384176 | 0.170587  | -0.539751 | 2.006863  | 0.073971  | -1.633299 | -1.249288 | 0.559449  |
| H | -2.546577 | -2.300888 | 0.441178  | -1.263221 | 1.914587  | -0.626101 | -2.587395 | -0.928368 | 0.680338  |
| H | -2.796919 | -0.601800 | 0.471206  | -0.041123 | 2.882666  | 0.055039  | -1.561745 | -1.880745 | -0.232328 |
| C | -0.998809 | 1.240566  | -0.033117 | -1.784677 | -0.543402 | -0.110316 | 1.767574  | 0.233944  | 0.148773  |
| N | -1.619550 | 2.205515  | 0.177478  | -2.879140 | -0.597687 | -0.501392 | 2.669642  | 0.944931  | 0.323667  |
